# Supplementary material for: Inappropriate cadherin switching in the mouse epiblast compromises proper signaling between the epiblast and the extraembryonic ectoderm during gastrulation
Source: PubMed Central journal article supplement (PMC4877576; doi:10.1038/srep26562), 2016-05-24
Supplement: srep26562-s1.pdf [file srep26562-s1.pdf]

**Inappropriate cadherin switching in the mouse epiblast compromises  
proper signaling between the epiblast and the extraembryonic  
ectoderm during gastrulation**

by

M. Felicia Basilicata, Marcus Frank, Davor Solter, Thomas Brabletz, and Marc P.  
Stemmler

**Supplementary Information**

Supplementary Figures S1-S5

Supplementary Tables S1, S2

**Figure S1**

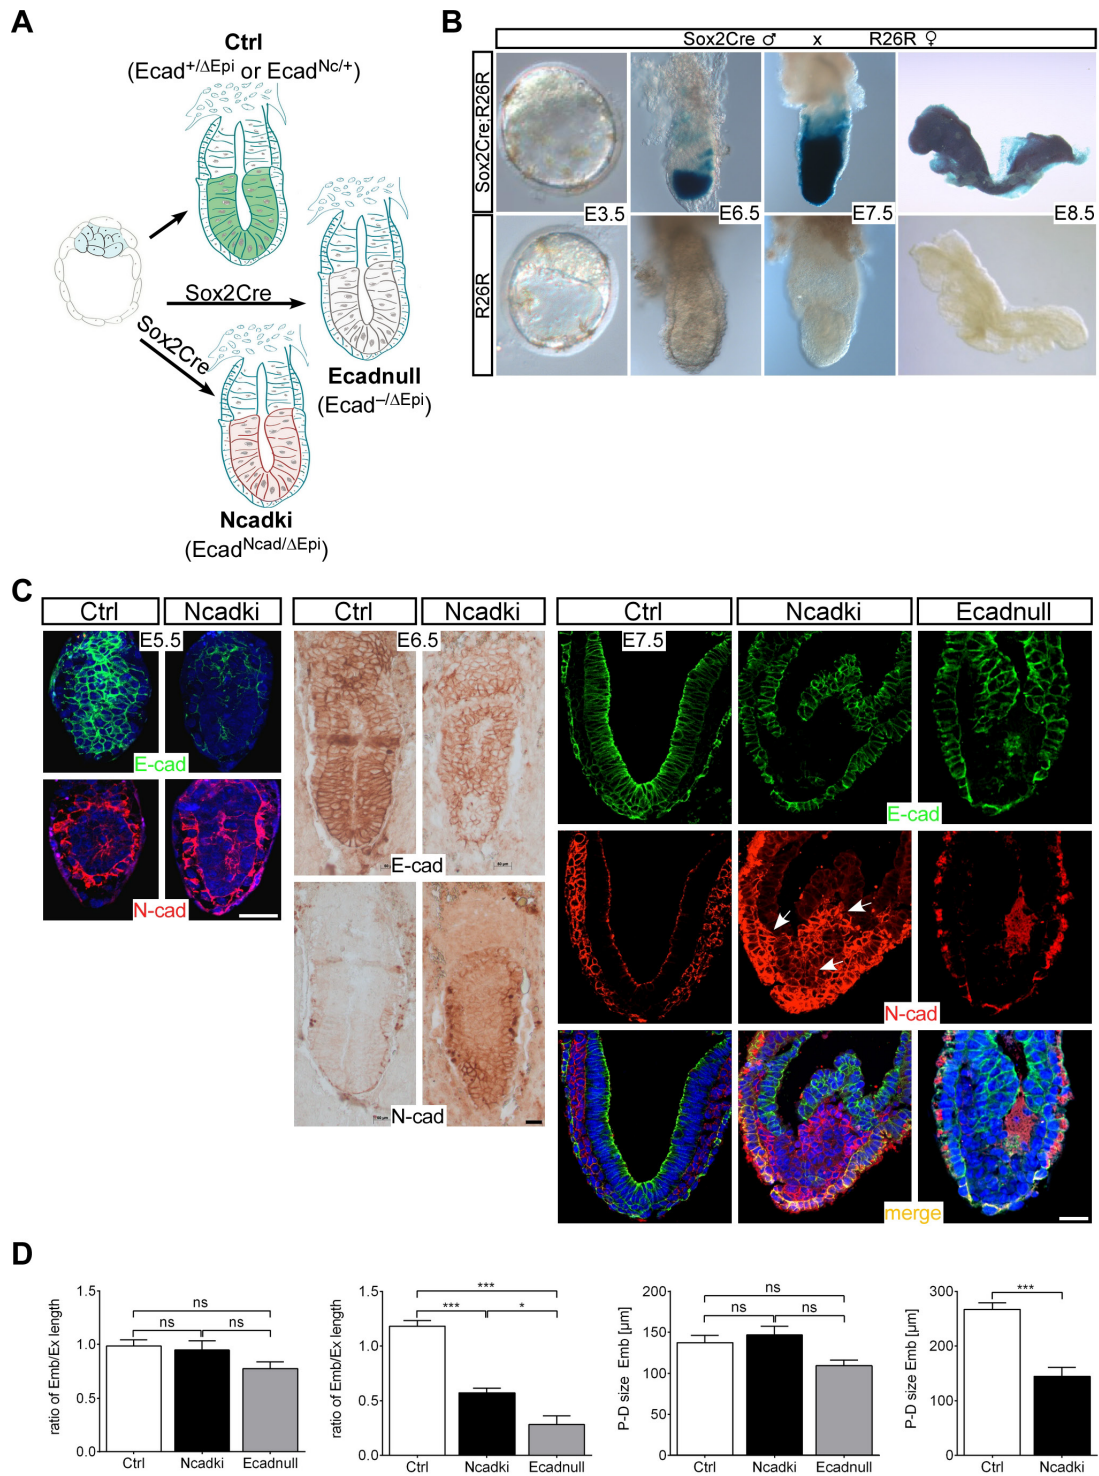

**Figure S1: Detailed analysis of Sox2Cre recombination efficiency and of the  $Ecad^{Ncad/\Delta Epi}$  phenotype.** (A) Schematic representation of the induced cadherin switch. Sox2Cre becomes activated after the blastocyst stage in the epiblast (green). Its activity depletes E-cad from the epiblast after implantation (Ecadnull, grey cells) and induces the cadherin switch in  $Ecad^{Ncad/\Delta Epi}$  with exclusively N-cad expression (Ncadki, red), whereas the control epiblast remains E-cad+ (Ctrls, green). (B) Analysis of Sox2Cre recombination efficiency in a spatio-temporal manner using the R26R allele between E3.5 and E8.5, displaying complete recombination already in E6.5 epiblasts. (C) Analysis of recombination efficiency of  $Ecad^{fl}$  in Ncadki and Ecadnull embryos by immunofluorescence (left and right panels) and immunohistochemistry staining (middle panel) at E5.5 (left), E6.5 (middle) and E7.5 (right). Already at E5.5 E-cad is properly depleted and only in a few embryos progeny of unrecombined escapers is detected. Arrows indicate variability in the N-cad expression levels between mesoderm (endogenous N-cad) and Ncadki expression in the epiblast. Scale bars represent 50  $\mu$ m. (D) Quantification of the proximal-distal (P-D) extension of the epiblast in Ncadki and Ecadnull embryos (n=4-14). The ratio of the extraembryonic (Ex) and the embryonic (Emb) is shown and absolute sizes of the epiblasts at E6.5 and E7.5 are given. Embryos are presented with proximal to the top, anterior to the left (E6.5-E7.5) or anterior to the left and dorsal to the top (E8.5).

**Figure S2**

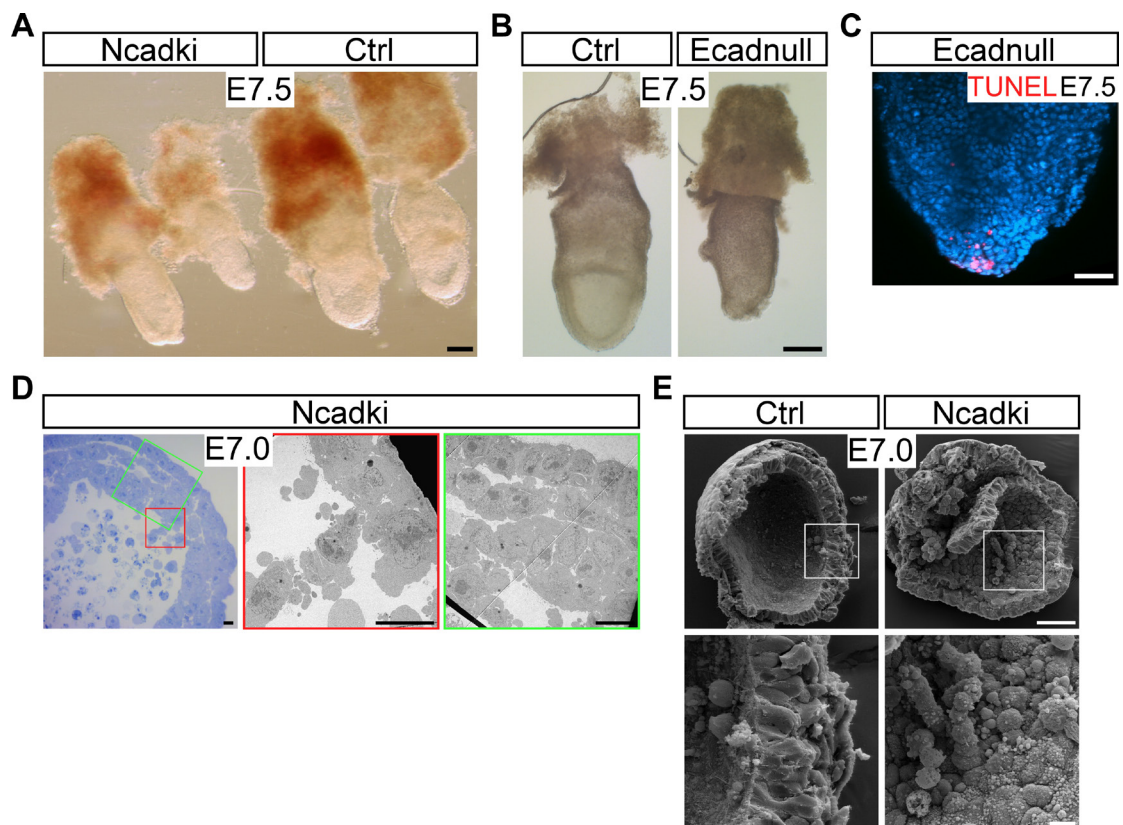

**Figure S2: E-cad is efficiently depleted in  $Ecad^{Ncad/\Delta Epi}$  embryos at E5.5.** (A) Variability in the mutant phenotype observed at E7.5, mainly characterized by size differences of the epiblast of mutants. Scale bar represents 100  $\mu\text{m}$ . (B, C) Morphological examination (B) and TUNEL staining (C) of Ecadnull embryos at E7.0, showing increased apoptosis in absence of adhesion in the epiblast. Scale bars represent 100  $\mu\text{m}$  for bright field images and 50  $\mu\text{m}$  for TUNEL. (D) Semithin and TEM images of mutant and control embryos, visualizing the cell detachment process in the mutants. Scale bars represent 10 $\mu\text{m}$ . (E) Ultrastructural analysis by scanning electron microscopy shows epiblast cells detaching from epiblast in chains in Ncadki E7.0 embryos. Scale bars represent 50  $\mu\text{m}$  for upper and 10  $\mu\text{m}$  for lower panels.

**Figure S3**

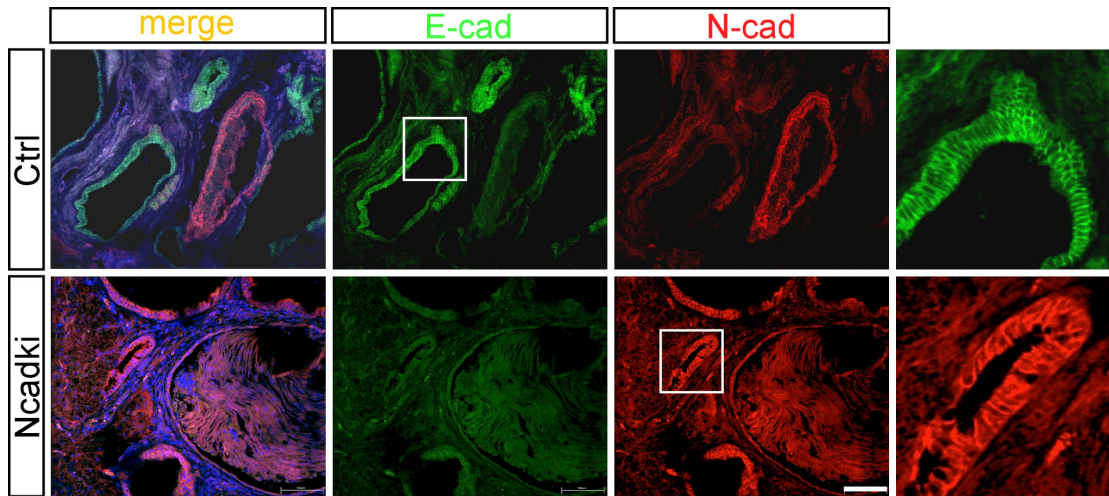

**Figure S3: Teratomas of Ncadki embryos show complete recombination in areas with a large variety of different tissues.** Cells that have differentiated into epithelia (keratinized epidermis-like cysts and enterocyte and goblet cell-containing intestinal tissues) are E-cad<sup>+</sup> in control specimen but exclusively express N-cad in mutant specimen. No E-cad<sup>+</sup> cell was detected in Ncadki-derived teratomas. Scale bar represents 100  $\mu$ m.

Figure S4

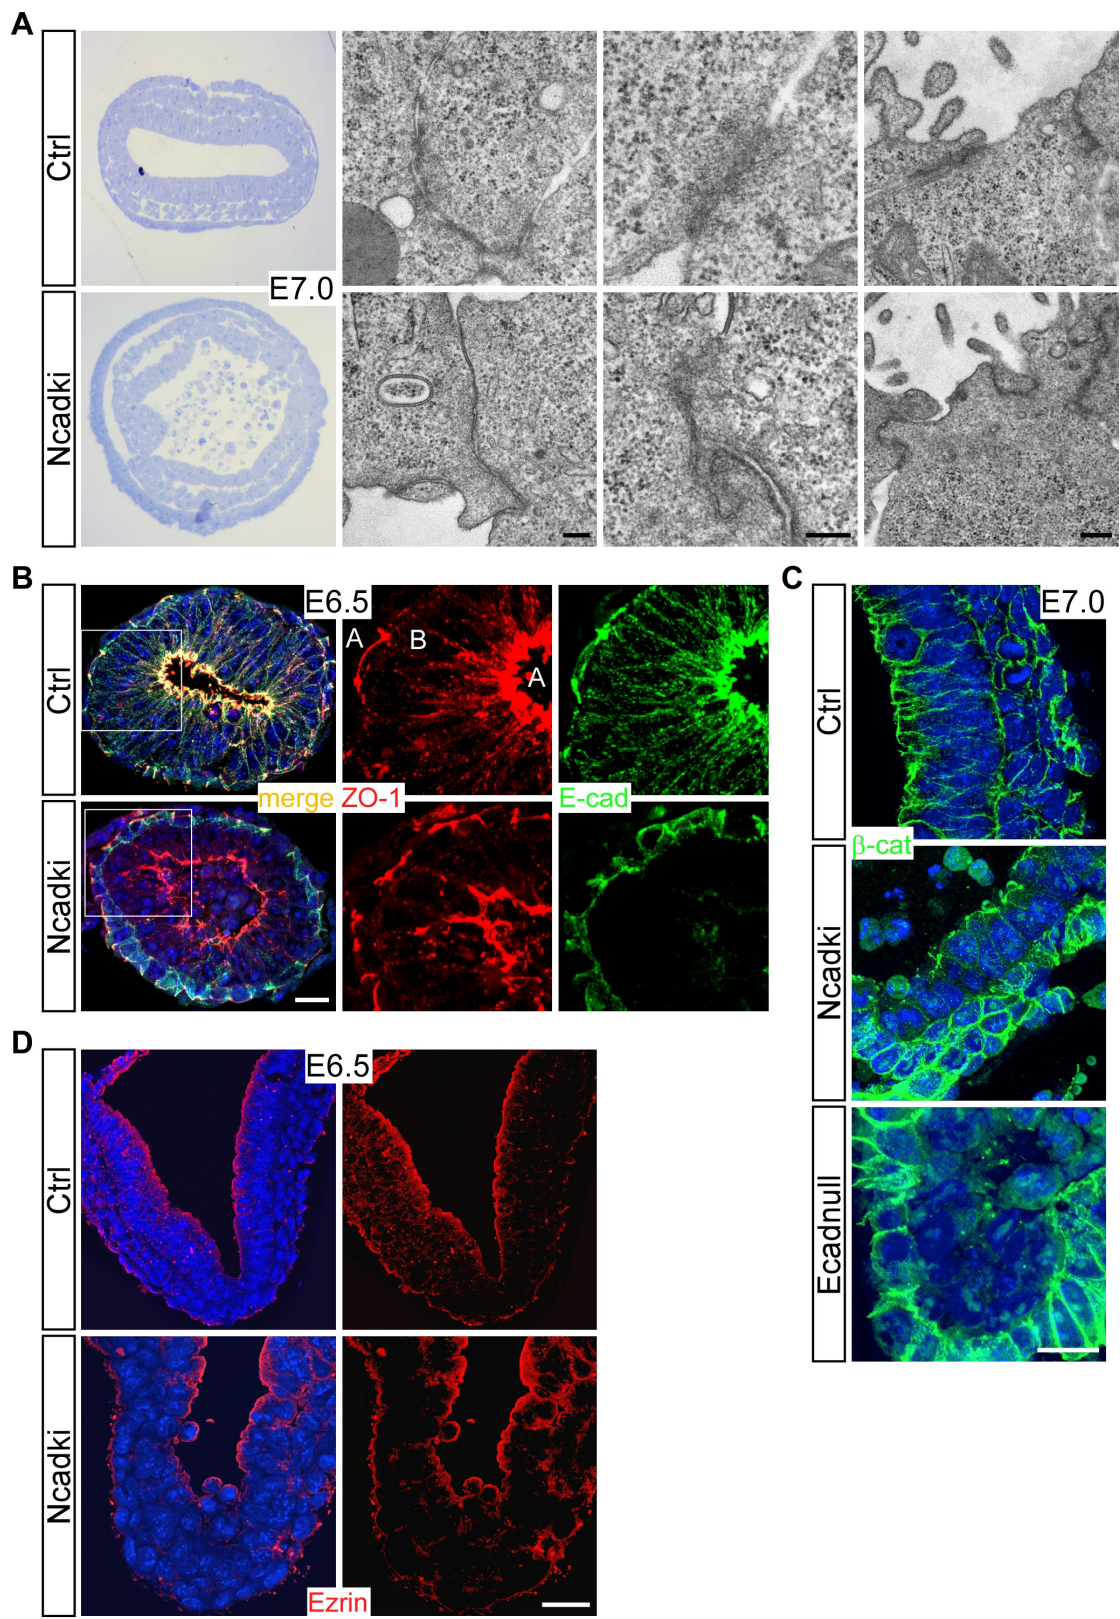

**Figure S4: Ncadki embryos form normal adherens junctions and cells of the epiblast show proper apical-basal polarity.** (A) Semithin sections and TEM analysis of control (upper) and Ncadki embryos (lower), showing proper formation of adherens and tight junctions in mutant epiblast cells. Note, that apical villi are forming in Ncadki embryos similar to controls. Scale bars represent 200 nm. (B) Immunofluorescence staining of E-cad (green) and the tight junctional protein ZO-1 (red). Similar to controls ZO-1 is concentrated at the apical side and E-cad is absent from the epiblast of Ncadki embryos. A, apical; B, basal. Scale bar represents 20  $\mu$ m. (C) Confocal images of immunofluorescently labeled sections of Ncadki and control embryos with anti- $\beta$ -catenin antibody (green), showing proper distribution of adherens junctions and adherens junction assembly, but a decreased intensity in Ncadki in comparison to control embryos. No membrane staining is detected in Ecadnull epiblasts. Scale bar represents 10  $\mu$ m. (D) Immunofluorescence labeling of the apical marker Ezrin (red) confirms proper apical-basal cell polarity in E7.5 Ncadki epiblast cells. Nuclei are stained with DAPI. Scale bars represent 50 $\mu$ m.

Figure S5

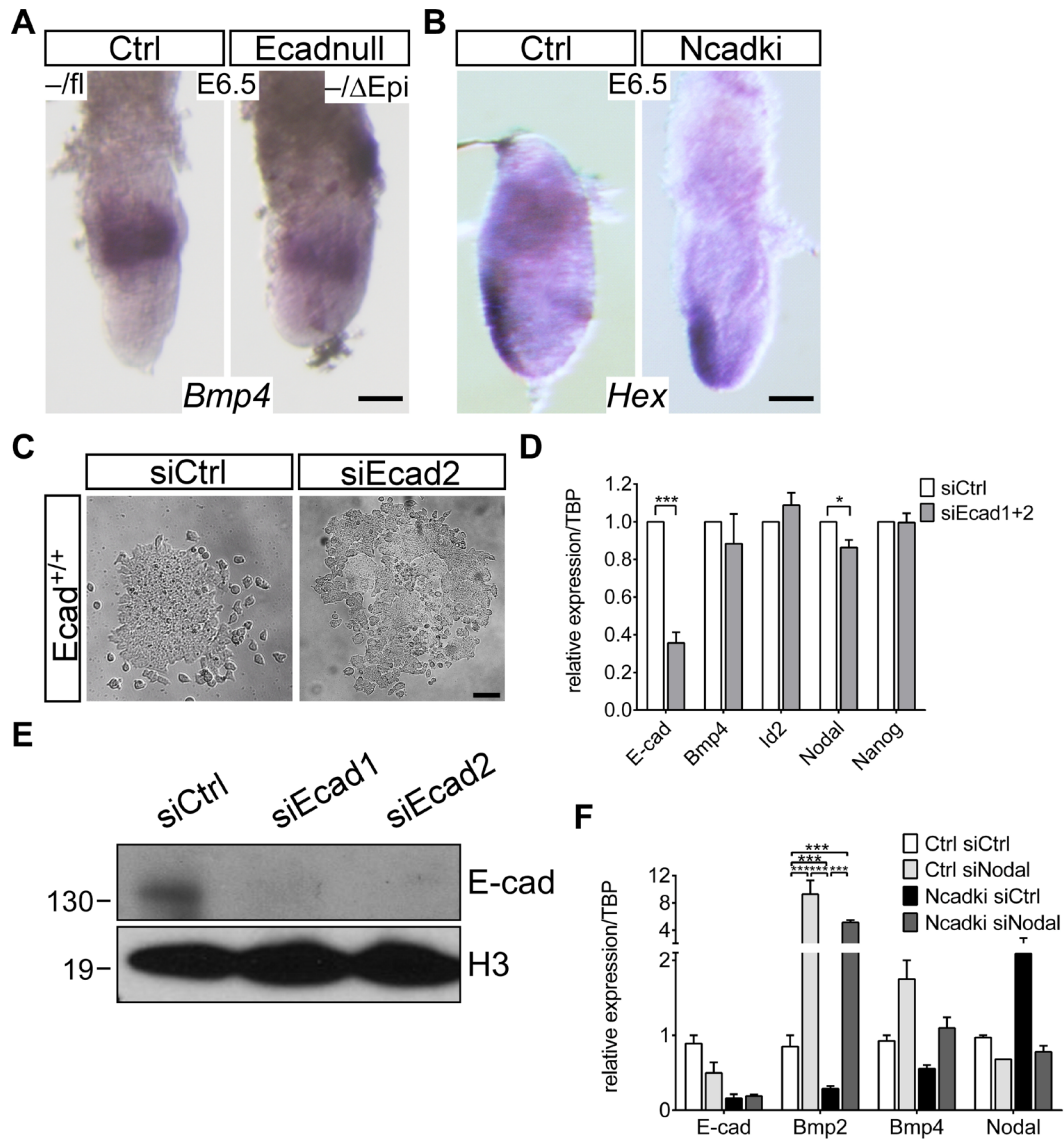



**Figure S5: Loss of E-cad alone is not accounting for reduction of BMP signaling in EpiSCs.** (A) Whole mount *in situ* hybridization of Bmp4 in Ecad<sup>-fl</sup> (Ctrl) and Ecad<sup>-ΔEpi</sup> (Ecadnull) E6.5 embryos showing that mono- and biallelic E-cad depletion is not substantially affecting BMP signaling. Scale bar represents 100 μm. (B) Analysis of Hex expression in control and Ncadki E6.5 mutant embryos. Scale bar represents 100 μm. (C) Cell morphology of Ecad<sup>-fl</sup> cells after siRNA-mediated E-cad knockdown (siEcad). Cells lose cell-cell contacts and become scattered as single cells. Scale bar represents 50 μm. (D) Western blot analysis of whole-cell lysates upon E-cad siRNA-mediated knockdown showing efficient E-cad depletion with two individual siRNAs using the antibody detecting the extracellular domain (extra-) of E-cad. Analysis of histone H3 (H3) is shown to verify equal loading. (E) qRT-PCR analysis of a subset of genes used in Fig. 5D, F upon E-cad knockdown with a mixture of two different siRNAs, showing that E-cad depletion alone is not altering BMP signaling in EpiSCs. (F) qRT-PCR analysis of Ecad<sup>Ncad/Δ</sup> (Ncadki) and Ecad<sup>+/Δ</sup> EpiSCs showing a partial rescue of Bmp expression upon Nodal depletion in Ncadki. Note, that the Nodal knockdown is very inefficient. Statistical significance was detected only for Bmp2 using 2-way ANOVA.

**Table S1:** Primers and UPL probes used for qRT-PCR

| <b>Gene</b>                              | <b>forward (5' → 3')</b>        | <b>reverse (5' → 3')</b>      | <b>UPL</b> |
|------------------------------------------|---------------------------------|-------------------------------|------------|
| <i>Actb</i> (β-Actin)                    | AAGGCCAACCGTGAAAAG<br>AT        | GTGGTACGACCAGAGGCAT<br>AC     | 56         |
| <i>Cdh1</i> (E-cad)                      | AGTGTTTGCTCGGCGTCT              | GCAAAGCCATGAGGAGACC           | 18         |
| <i>Cdh2-ki</i> (N-cad<br>knockin allele) | CCATGGCCACTAGTATGT<br>GC        | AATTTCCACCAGAAGCCTCCA         | 74         |
| <i>Nanog</i>                             | TTCTTGCTTACAAGGGTCT<br>GC       | AGAGGAAGGGCGAGGAGA            | 110        |
| <i>Oct4</i>                              | GTTGGAGAAGGTGGAACC<br>AA        | CTCCTTCTGCAGGGCTTTC           | 95         |
| <i>Sox2</i>                              | TCCAAAACTAATCACAAC<br>AATCG     | GAAGTGCAATTGGGATGAA<br>AA     | 63         |
| <i>Tbp</i>                               | CGGTCGCGTCATTTTCTC              | GGTTATCTTCACACACCAT<br>GA     | 107        |
| <i>Cer1</i>                              | CTGTGCCCTTCAACCAG<br>AC         | AGCAGTGGGAGCAGAAGC            | 105        |
| <i>Fgf5</i>                              | AAAACCTGGTGCACCCTA<br>GA        | CATCACATTCCCGAATTAGC          | 29         |
| <i>Bmp4</i>                              | GGATCTTTACCGGCTCCA<br>G         | GGGATGTTCTCCAGATGTG<br>TTCTT  | 21         |
| <i>Bmpr1a</i>                            | TGCTTGAGATACTCTTACA<br>ATAATGCT | TGGCTGTCTGTATAGTTGCT<br>ATGAT | 78         |
| <i>Nodal</i>                             | CCAACCATGCCTACATCC<br>A         | CACAGCACGTGGAGGAAC            | 40         |
| <i>T</i> (T-bra)                         | GCCAGCCCACCTACTGG               | GAGCCTGGGGTGATGGTA            | 100        |
| <i>Id2</i>                               | ACAGAACCAGGCGTCCAG              | AGCYCAGAAGGGAATTCAG<br>ATG    | 89         |
| <i>Mmp7</i>                              | TAATTGGCTTCGCAAGGA<br>G         | AGTGTTCCCTGGCCCATC            | 94         |
| <i>Itgb1</i> (CD29)                      | TGGCAACAATGAAGCTAT<br>CG        | ATGTCGGGACCAGTAGGAC<br>A      | 109        |
| <i>Smad5</i>                             | CAAGCTCTGGACCTGGAA<br>GT        | GAATTATCTGGGGCCATCT<br>G      | 33         |
| <i>Smad3</i>                             | GCCACTGTCTGCAAGATC<br>C         | AGCTAGGAGGGCAGCAAAT           | 64         |
| <i>Msx2</i>                              | AGGAGCCCGGCAGATACT              | GTTTCCTCAGGGTGCAGG            | 70         |
| <i>Ctnnb1</i> (β-cat)                    | GCTGACCAGTTCCTCCT<br>TCA        | CACCAATGTCCAGTCCAAG<br>A      | 21         |
| <i>Lefty1</i>                            | ACTCAGTATGTGGCCCTG<br>CT        | AACCTGCCTGCCACCTC             | 76         |

**Table S2:** siRNAs used for knockdown experiments

| siRNA/gene       | Sequence or Catalogue Number                                                  | Provider                              |
|------------------|-------------------------------------------------------------------------------|---------------------------------------|
| Mm_Cdh1_1        | CTCGCGGATAACCAGAACAAA                                                         | Qiagen FlexiTube<br>Gene solution_2   |
| Mm_Cdh1_2        | TACCATGTTTGCTGTATTCTA                                                         | Qiagen FlexiTube<br>Gene solution_5   |
| Mm_Cdh1 Mix      |                                                                               | Qiagen FlexiTube<br>Gene solution_2&5 |
| Mm_Nodal         | SI01328936, SI01328929, SI01328922,<br>SI01328915                             | Qiagen FlexiTube<br>Gene solution     |
| negative control | ON-TARGET <sup>plus</sup> Non-targeting siRNA<br>#1 Dharmacon, D-001810-01-05 | Dharmacon                             |
